# Supplementary material for: Dynamics of RSV hospitalization rates in ≤ 2-year-old children between 2020–2023 in Europe
Source: Springer Nature journal article supplement (doi:10.1007/s00431-025-06218-1), 2025-09-13

**Supplementary materials**

**Supplementary table 1. Age distribution, length of stay and proportion of PICU admission associated with RSV hospitalization by season and country.**

1. Germany

| **Number of RSV hospitalizations** | **2018 Sep -2019 Aug** | | **2020 Oct -2021 Sep** | | **2021 Oct -2022 Sep** | | **2022 Oct - 2023 Sep** | |
| --- | --- | --- | --- | --- | --- | --- | --- | --- |
| **N** | **%** | **N** | **%** | **N** | **%** | **N** | **%** |
| Total | 165 |  | 34 |  | 182 |  | 204 |  |
| **Age group (months)** |  |  |  |  |  |  |  |  |
| 0-2 months | 70 | 42.4 | 11 | 32.4 | 87 | 47.8 | 115 | 56.4 |
| 3-5 months | 40 | 24.2 | 8 | 23.5 | 32 | 17.6 | 34 | 16.7 |
| 6-12 months | 23 | 13.9 | 5 | 14.7 | 31 | 17.0 | 27 | 13.2 |
| 13-24 months | 32 | 19.4 | 10 | 29.4 | 32 | 17.6 | 28 | 13.7 |
| **PICU admission** | 14 | 8.5 | 6 | 17.7 | 12 | 6.6 | 27 | 13.2 |
| 0-2 months | 11 | 15.7 | 6 | 54.6 | 10 | 11.5 | 17 | 14.8 |
| 3-5 months | 3 | 7.5 | 0 | 0 | 1 | 3.1 | 5 | 14.7 |
| 6-12 months | 0 | 0 | 0 | 0 | 0 | 0 | 3 | 11.1 |
| 13-24 months | 0 | 0 | 0 | 0 | 1 | 3.1 | 2 | 7.1 |
| **LOS (days)** | **Mean** | **SD*** | **Mean** | **SD*** | **Mean** | **SD*** | **Mean** | **SD*** |
| Total | 6.0 | 3.5 | 4.7 | 2.7 | 4.6 | 2.7 | 4.2 | 3.1 |
| 0-2 months | 7.4 | 2.4 | 6.3 | 3.8 | 5.2 | 2.9 | 4.2 | 3.0 |
| 3-5 months | 5.4 | 4.3 | 3.4 | 2.7 | 4.7 | 2.1 | 3.2 | 2.9 |
| 6-12 months | 4.6 | 2.4 | 2.8 | 1.6 | 4.0 | 2.1 | 4.9 | 3.9 |
| 13-24 months | 4.7 | 5.1 | 5.1 | 1.7 | 3.7 | 3.0 | 4.6 | 2.8 |

1. Spain

| **Number of RSV hospitalizations** | **2018 Sep -2019 Aug** | | **2020 Oct -2021 Sep** | | **2021 Oct -2022 Sep** | | **2022 Oct - 2023 Sep** | |
| --- | --- | --- | --- | --- | --- | --- | --- | --- |
| **N** | **%** | **N** | **%** | **N** | **%** | **N** | **%** |
| Total | 402 |  | 141 |  | 149 |  | 323 |  |
| **Age group (months)** |  |  |  |  |  |  |  |  |
| 0-2 months | 202 | 50.2 | 76 | 53.9 | 72 | 48.3 | 150 | 46.4 |
| 3-5 months | 72 | 17.9 | 19 | 13.5 | 25 | 16.8 | 80 | 24.8 |
| 6-12 months | 74 | 18.4 | 25 | 17.7 | 30 | 20.1 | 62 | 19.2 |
| 13-24 months | 54 | 13.4 | 21 | 14.9 | 22 | 14.8 | 31 | 9.6 |
| **PICU admission** | 87 | 21.6 | 50 | 35.5 | 44 | 29.5 | 82 | 25.4 |
| 0-2 months | 65 | 32.2 | 36 | 47.4 | 27 | 37.5 | 52 | 34.7 |
| 3-5 months | 9 | 12.5 | 8 | 42.1 | 7 | 28 | 17 | 21.3 |
| 6-12 months | 9 | 12.2 | 2 | 8 | 4 | 13.3 | 5 | 8.1 |
| 13-24 months | 4 | 7.4 | 4 | 19.1 | 6 | 27.3 | 8 | 25.8 |
| **LOS (days)** | **Mean** | **SD*** | **Mean** | **SD*** | **Mean** | **SD*** | **Mean** | **SD*** |
| Total | 5.9 | 3.6 | 6.6 | 3.5 | 6.3 | 3.3 | 5.7 | 8.5 |
| 0-2 months | 7.2 | 4.5 | 7.3 | 3.1 | 7.6 | 3.9 | 6.3 | 11.9 |
| 3-5 months | 4.9 | 2.3 | 7.5 | 4.9 | 5.6 | 3.0 | 5.5 | 3.0 |
| 6-12 months | 4.9 | 2.6 | 4.6 | 2.3 | 4.9 | 1.9 | 4.8 | 2.2 |
| 13-24 months | 4.1 | 2.1 | 5.4 | 4.6 | 4.3 | 1.9 | 4.8 | 2.3 |

1. France

| **Number of RSV hospitalizations** | **2018 Sep -2019 Aug** | | **2020 Oct -2021 Sep** | | **2021 Oct -2022 Sep** | | **2022 Oct - 2023 Sep** | |
| --- | --- | --- | --- | --- | --- | --- | --- | --- |
| **N** | **%** | **N** | **%** | **N** | **%** | **N** | **%** |
| Total | 268 |  | 315 |  | 420 |  | 553 |  |
| **Age group (months)** |  |  |  |  |  |  |  |  |
| 0-2 months | 152 | 56.7 | 184 | 58.4 | 275 | 65.5 | 356 | 64.4 |
| 3-5 months | 70 | 26.1 | 57 | 18.1 | 82 | 19.5 | 105 | 19.0 |
| 6-12 months | 31 | 11.6 | 60 | 19.0 | 56 | 13.3 | 67 | 12.1 |
| 13-24 months | 15 | 5.6 | 14 | 4.4 | 7 | 1.7 | 25 | 4.5 |
| **PICU admission** | 54 | 20.2 | 90 | 28.6 | 88 | 21.0 | 142 | 25.6 |
| 0-2 months | 47 | 30.9 | 71 | 38.6 | 70 | 25.5 | 115 | 32.3 |
| 3-5 months | 4 | 5.7 | 11 | 19.3 | 11 | 13.4 | 18 | 17.0 |
| 6-12 months | 2 | 6.5 | 8 | 13.3 | 6 | 10.7 | 7 | 10.3 |
| 13-24 months | 1 | 6.7 | 0 | 0 | 1 | 14.3 | 2 | 8.0 |
| **LOS (days)** | **Mean** | **SD*** | **Mean** | **SD*** | **Mean** | **SD*** | **Mean** | **SD*** |
| Total | 4.1 | 2.5 | 5.4 | 4.0 | 4.7 | 3.3 | 5.1 | 2.6 |
| 0-2 months | 4.5 | 2.8 | 6.0 | 4.5 | 5.0 | 3.5 | 5.1 | 2.7 |
| 3-5 months | 3.3 | 1.9 | 4.6 | 3.3 | 4.6 | 3.2 | 4.8 | 2.3 |
| 6-12 months | 4.2 | 2.9 | 4.7 | 2.7 | 3.6 | 2.1 | 5.2 | 2.5 |
| 13-24 months | 4.4 | 1.7 | 4.1 | 1.4 | 3.7 | 0.7 | 5.2 | 2.2 |

1. Italy

| **Number of RSV hospitalizations** | **2018 Sep -2019 Aug** | | **2020 Oct -2021 Sep** | | **2021 Oct -2022 Sep** | | **2022 Oct - 2023 Sept** | |
| --- | --- | --- | --- | --- | --- | --- | --- | --- |
| **N** | **%** | **N** | **%** | **N** | **%** | **N** | **%** |
| Total | 227 |  | 13 |  | 442 |  | 630 |  |
| **Age group (months)** |  |  |  |  |  |  |  |  |
| 0-2 months | 137 | 60.4 | 3 | 23.1 | 241 | 54.5 | 345 | 54.8 |
| 3-5 months | 35 | 15.4 | 4 | 30.8 | 61 | 13.8 | 116 | 18.4 |
| 6-12 months | 22 | 9.7 | 4 | 30.8 | 67 | 15.2 | 94 | 14.9 |
| 13-24 months | 33 | 14.5 | 2 | 15.4 | 73 | 16.5 | 75 | 11.9 |
| **PICU admission** | 29 | 12.8 | 3 | 23.1 | 80 | 18.1 | 117 | 18.6 |
| 0-2 months | 19 | 13.9 | 1 | 33.3 | 49 | 20 | 71 | 20.6 |
| 3-5 months | 5 | 14.3 | 0 | 0 | 11 | 18.0 | 22 | 19.0 |
| 6-12 months | 2 | 9.1 | 1 | 25 | 8 | 11.9 | 11 | 11.7 |
| 13-24 months | 3 | 9.1 | 1 | 50 | 12 | 16.4 | 13 | 17.3 |
| **LOS (days)** | **Mean** | **SD*** | **Mean** | **SD*** | **Mean** | **SD*** | **Mean** | **SD*** |
| Total | 7.4 | 6.0 | 7.9 | 6.0 | 6.9 | 5.6 | 7.4 | 7.3 |
| 0-2 months | 6.7 | 4.9 | 4.3 | - | 7.1 | 4.6 | 7.5 | 6.8 |
| 3-5 months | 10.2 | 10.5 | 7.8 | - | 6.5 | 5.6 | 8.1 | 9.7 |
| 6-12 months | 7.0 | 5.2 | 10 | 5.7 | 5.9 | 6.4 | 6.4 | 4.8 |
| 13-24 months | 7.9 | 4.8 | 9.5 | 6.4 | 7.6 | 7.4 | 7.4 | 8.2 |

1. United Kingdom

| **Number of RSV hospitalizations** | **2018 Sep -2019 Aug** | | **2020 Oct -2021 Sep** | | **2021 Oct -2022 Sep** | | **2022 Oct - 2023 Sep** | |
| --- | --- | --- | --- | --- | --- | --- | --- | --- |
| **N** | **%** | **N** | **%** | **N** | **%** | **N** | **%** |
| Total | 176 |  | 107 |  | 217 |  | 201 |  |
| **Age group (months)** |  |  |  |  |  |  |  |  |
| 0-2 months | 74 | 42 | 38 | 35.5 | 68 | 31.3 | 97 | 48.3 |
| 3-5 months | 35 | 19.9 | 10 | 9.3 | 30 | 13.8 | 23 | 11.4 |
| 6-12 months | 40 | 22.7 | 16 | 15.0 | 42 | 19.4 | 26 | 12.9 |
| 13-24 months | 27 | 15.3 | 43 | 40.2 | 77 | 35.5 | 55 | 27.4 |
| **PICU admission** | 64 | 36.4 | 31 | 29.0 | 55 | 25.4 | 59 | 29.4 |
| 0-2 months | 33 | 44.6 | 20 | 52.6 | 25 | 36.8 | 41 | 42.3 |
| 3-5 months | 13 | 37.1 | 2 | 20 | 11 | 36.7 | 6 | 26.1 |
| 6-12 months | 13 | 32.5 | 3 | 18.8 | 7 | 16.7 | 7 | 26.9 |
| 13-24 months | 5 | 18.5 | 6 | 14.0 | 12 | 15.6 | 5 | 9.1 |
| **LOS (days)** | **Mean** | **SD*** | **Mean** | **SD*** | **Mean** | **SD*** | **Mean** | **SD*** |
| Total | 5.2 | 5.3 | 4.1 | 2.8 | 5.5 | 3.5 | 4.9 | 5.4 |
| 0-2 months | 5.8 | 4.5 | 5.8 | 3.7 | 5.4 | 3.5 | 5.6 | 4.2 |
| 3-5 months | 5.1 | 8.3 | 3.1 | 2.3 | 6.1 | 3.6 | 3.5 | 1.9 |
| 6-12 months | 4.5 | 3.0 | 2.4 | 1.9 | 7.6 | 4.0 | 4.2 | 3.0 |
| 13-24 months | 4.7 | 5.3 | 3.5 | 2.2 | 4.1 | 3.1 | 4.5 | 8.2 |

* Pooled standard deviations were calculated as the square root of the weighted average of squared standard deviations available for each month per site and for each of the age group (0-2, 3-5, 6-12 and 13-24 months) and with the corresponding number of hospitalized children minus one as the weight (as individual patient data was not available). The resulting pooled SDs do not account for any systematic variation between year, site and age groups in the mean LOS and may therefore underestimate the true standard deviations.

**Supplementary Table 2. Annual incidence rates of RSV associated hospitalizations by country, season, and age groups.**

A. Germany

|  | **Number of RSV hospitalizations** | **Number of children in catchment area** | **Incidence per 1000 child-years (95% CI)** |
| --- | --- | --- | --- |
|  | **2018 Sep – 2019 Aug** | | |
| **Age (months)** |  |  |  |
| 0-5 | 110 | 6129 | 17.95 (14.75-21.63) |
| 6-12 | 23 | 7150 | 3.22 (2.04-4.83) |
| 13-24 | 32 | 12428 | 2.57 (1.76-3.63) |
| 0-12 | 133 | 13279 | 10.02 (8.39-11.87) |
| 0-24 | 165 | 25707 | 6.42 (5.48-7.48) |
|  | **2020 Oct – 2021 Sep** | | |
| **Age (months)** |  |  |  |
| 0-5 | 19 | 6171 | 3.08 (1.85-4.81) |
| 6-12 | 5 | 7200 | 0.69 (0.23-1.62) |
| 13-24 | 10 | 12612 | 0.79 (0.38-1.46) |
| 0-12 | 24 | 13371 | 1.79 (1.15-2.67) |
| 0-24 | 34 | 25983 | 1.31 (0.91-1.83) |
|  | **2021 Oct – 2022 Sep*** | | |
| **Age (months)** |  |  |  |
| 0-5 | 119 | 6058 | 19.64 (16.27-23.50) |
| 6-12 | 31 | 7068 | 4.39 (2.98-6.23) |
| 13-24 | 32 | 12757 | 2.51 (1.72-3.54) |
| 0-12 | 150 | 13126 | 11.43 (9.67-13.41) |
| 0-24 | 182 | 25883 | 7.03 (6.05-8.13) |
| **2022 Oct – 2023 Sep*** | | | |
| **Age (months)** |  |  |  |
| 0-5 | 149 | 6012 | 24.78 (20.96-29.10) |
| 6-12 | 27 | 7014 | 3.85 (2.54-5.60) |
| 13-24 | 28 | 12371 | 2.26 (1.50-3.27) |
| 0-12 | 176 | 13026 | 13.51 (11.59-15.66) |
| 0-24 | 204 | 25397 | 8.03 (6.97-9.21) |

* For Germany site 4901, the denominator numbers from 2022 were used due to the unavailability of denominator numbers for 2023. For Germany site 4902, the denominator numbers from 2021 were used due to the unavailability of denominator numbers for 2022 and 2023.

B. Spain

|  | **Number of RSV hospitalizations** | **Number of children in catchment area** | **Incidence per 1000 child-years (95% CI)** |
| --- | --- | --- | --- |
|  | **2018 Sep – 2019 Aug** | | |
| **Age (months)** |  |  |  |
| 0-5 | 274 | 3505 | 78.17 (69.19-88.00) |
| 6-12 | 74 | 4272 | 17.32 (13.60-21.74) |
| 13-24 | 54 | 7934 | 6.81 (5.11-8.88) |
| 0-12 | 348 | 7777 | 44.74 (40.17-49.70) |
| 0-24 | 402 | 15711 | 25.59 (23.15-28.21) |
|  | **2020 Oct – 2021 Sep** | | |
| **Age (months)** |  |  |  |
| 0-5 | 95 | 3093 | 30.72 (24.85-37.55) |
| 6-12 | 25 | 3604 | 6.94 (4.49-10.24) |
| 13-24 | 21 | 6769 | 3.10 (1.92-4.74) |
| 0-12 | 120 | 6697 | 17.92 (14.86-21.43) |
| 0-24 | 141 | 13466 | 10.47 (8.81-12.35) |
|  | **2021 Oct – 2022 Sep*** | | |
| **Age (months)** |  |  |  |
| 0-5 | 97 | 3076 | 31.53 (25.57-38.47) |
| 6-12 | 30 | 3555 | 8.44 (5.69-12.05) |
| 13-24 | 22 | 6672 | 3.30 (2.07-4.99) |
| 0-12 | 127 | 6631 | 19.15 (15.97-22.79) |
| 0-24 | 149 | 13303 | 11.20 (9.47-13.15) |
| **2022 Oct – 2023 Sep*** | | | |
| **Age (months)** |  |  |  |
| 0-5 | 230 | 3073 | 74.85 (65.48-85.17) |
| 6-12 | 62 | 3552 | 17.45 (13.38-22.38) |
| 13-24 | 31 | 6667 | 4.65 (3.16-6.60) |
| 0-12 | 292 | 6625 | 44.08 (39.16-49.43) |
| 0-24 | 323 | 13292 | 24.30 (21.72-27.10) |

*For Spain site 3401, the denominator numbers from 2021 were used due to the unavailability of denominator numbers for 2022 and 2023. For Spain site 3402, the denominator numbers from 2022 were used due to the unavailability of denominator numbers for 2023.

C. France

|  | **Number of RSV hospitalizations** | **Number of children in catchment area** | **Incidence per 1000 child-years (95% CI)** |
| --- | --- | --- | --- |
|  | **2018 Sep – 2019 Aug** | | |
| **Age (months)** |  |  |  |
| 0-5 | 222 | 4212 | 52.71 (46.00-60.11) |
| 6-12 | 31 | 4914 | 6.31 (4.29-8.96) |
| 13-24 | 15 | 8422 | 1.78 (1.00-2.94) |
| 0-12 | 253 | 9126 | 27.72 (24.41-31.36) |
| 0-24 | 268 | 17548 | 15.27 (13.50-17.21) |
|  | **2020 Oct – 2021 Sep** | | |
| **Age (months)** |  |  |  |
| 0-5 | 241 | 4184 | 57.6 (50.56-65.35) |
| 6-12 | 60 | 4881 | 12.29 (9.38-15.82) |
| 13-24 | 14 | 8366 | 1.67 (0.91-2.81) |
| 0-12 | 301 | 9065 | 33.21 (29.56-37.18) |
| 0-24 | 315 | 17431 | 18.07 (16.13-20.18) |
|  | **2021 Oct – 2022 Sep** | | |
| **Age (months)** |  |  |  |
| 0-5 | 357 | 4078 | 87.54 (78.69-97.11) |
| 6-12 | 56 | 4758 | 11.77 (8.89-15.29) |
| 13-24 | 7 | 8156 | 0.86 (0.35-1.77) |
| 0-12 | 413 | 8836 | 46.74 (42.34-51.47) |
| 0-24 | 420 | 16992 | 24.72 (22.41-27.20) |
| **2022 Oct – 2023 Sep*** | | | |
| **Age (months)** |  |  |  |
| 0-5 | 461 | 4042 | 114.05 (103.88-124.95) |
| 6-12 | 67 | 4715 | 14.21 (11.01-18.05) |
| 13-24 | 25 | 8083 | 3.09 (2.00-4.57) |
| 0-12 | 528 | 8757 | 60.29 (55.26-65.66) |
| 0-24 | 553 | 16840 | 32.84 (30.16-35.69) |

* Denominator numbers from 2022 were used due to the unavailability of denominator numbers for 2023.

D. Italy

|  | **Number of RSV hospitalizations** | **Number of children in catchment area** | **Incidence per 1000 child-years (95% CI)** |
| --- | --- | --- | --- |
|  | **2018 Sep – 2019 Aug** | | |
| **Age (months)** |  |  |  |
| 0-5 | 172 | 8024 | 21.43 (18.35-24.89) |
| 6-12 | 22 | 9362 | 2.35 (1.47-3.56) |
| 13-24 | 33 | 18470 | 1.79 (1.23-2.51) |
| 0-12 | 194 | 17386 | 11.16 (9.64-12.84) |
| 0-24 | 227 | 35856 | 6.33 (5.53-7.21) |
|  | **2020 Oct – 2021 Sep** | | |
| **Age (months)** |  |  |  |
| 0-5 | 7 | 7829 | 0.89 (0.36-1.84) |
| 6-12 | 4 | 9134 | 0.44 (0.12-1.12) |
| 13-24 | 2 | 17053 | 0.12 (0.01-0.42) |
| 0-12 | 11 | 16963 | 0.65 (0.32-1.16) |
| 0-24 | 13 | 34016 | 0.38 (0.20-0.65) |
|  | **2021 Oct – 2022 Sep** | | |
| **Age (months)** |  |  |  |
| 0-5 | 302 | 7696 | 39.24 (34.94-43.92) |
| 6-12 | 67 | 8979 | 7.46 (5.78-9.48) |
| 13-24 | 73 | 16552 | 4.41 (3.46-5.55) |
| 0-12 | 369 | 16675 | 22.13 (19.93-24.50) |
| 0-24 | 442 | 33227 | 13.30 (12.09-14.60) |
| **2022 Oct – 2023 Sep*** | | | |
| **Age (months)** |  |  |  |
| 0-5 | 461 | 7613 | 60.56 (55.15-66.34) |
| 6-12 | 94 | 8882 | 10.58 (8.55-12.95) |
| 13-24 | 75 | 16499 | 4.55 (3.58-5.70) |
| 0-12 | 555 | 16495 | 33.65 (30.90-36.57) |
| 0-24 | 630 | 32994 | 19.09 (17.63-20.65) |

*For Italy site 3902, the denominator numbers from 2022 were used due to the unavailability of denominator numbers for 2023.

E. United Kingdom

|  | **Number of RSV hospitalizations** | **Number of children in catchment area** | **Incidence per 1000 child-years (95% CI)** |
| --- | --- | --- | --- |
|  | **2018 Sep – 2019 Aug** | | |
| **Age (months)** |  |  |  |
| 0-5 | 109 | 3616 | 30.14 (24.75-36.36) |
| 6-12 | 40 | 4226 | 9.46 (6.76-12.89) |
| 13-24 | 27 | 7336 | 3.68 (2.43-5.36) |
| 0-12 | 149 | 7842 | 19.00 (16.07-22.31) |
| 0-24 | 176 | 15178 | 11.60 (9.95-13.44) |
|  | **2020 Oct – 2021 Sep** | | |
| **Age (months)** |  |  |  |
| 0-5 | 48 | 3216 | 14.93 (11.00-19.79) |
| 6-12 | 16 | 3757 | 4.26 (2.43-6.92) |
| 13-24 | 43 | 6494 | 6.62 (4.79-8.92) |
| 0-12 | 64 | 6973 | 9.18 (7.07-11.72) |
| 0-24 | 107 | 13467 | 7.95 (6.51-9.60) |
|  | **2021 Oct – 2022 Sep*** | | |
| **Age (months)** |  |  |  |
| 0-5 | 98 | 3147 | 31.14 (25.28-37.95) |
| 6-12 | 42 | 3672 | 11.44 (8.24-15.46) |
| 13-24 | 77 | 6302 | 12.22 (9.64-15.27) |
| 0-12 | 140 | 6819 | 20.53 (17.27-24.23) |
| 0-24 | 217 | 13121 | 16.54 (14.41-18.89) |
| **2022 Oct – 2023 Sep*** | | | |
| **Age (months)** |  |  |  |
| 0-5 | 120 | 3149 | 38.11 (31.59-45.57) |
| 6-12 | 26 | 3673 | 7.08 (4.62-10.37) |
| 13-24 | 55 | 6285 | 8.75 (6.59-11.39) |
| 0-12 | 146 | 6822 | 21.40 (18.07-25.17) |
| 0-24 | 201 | 13107 | 15.34 (13.29-17.61) |

*For the United Kingdom site 4401, the denominator numbers from 2021 were used due to the unavailability of denominator numbers for 2022 and 2023. For the United Kingdom, site 4402 the denominator numbers from 2022 were used due to the unavailability of denominator numbers for 2023.

**Supplementary table 3. RSV testing practices in the participating hospitals**

| **Site ID** | **3301** | **3302** | **3401** | **3402** | **3901** | **3902** | **4401** | **4402** | **4901** | **4902** |
| --- | --- | --- | --- | --- | --- | --- | --- | --- | --- | --- |
| **Season** |
| **01Sep2018 - 30Apr2019** | PCR and rapid multiplex molecular/PCR based test | PCR and rapid multiplex molecular/PCR based test | RAD and rapid multiplex molecular/PCR based test | PCR | PCR and rapid multiplex molecular/PCR based test | RAD and rapid multiplex molecular/PCR based test | PCR | PCR | PCR and rapid multiplex molecular/PCR based test | PCR and rapid multiplex molecular/PCR based test |
| **01Oct2020 - 30Sep2021** | Rapid multiplex molecular/PCR based test | PCR and rapid multiplex molecular/PCR based test | PCR and rapid multiplex molecular/PCR based test | PCR, RAD and rapid multiplex molecular/PCR based test |
| **01Oct2021 - 30Sep2022** | Rapid multiplex molecular/PCR based test | Rapid multiplex molecular/PCR based test |
| **01Oct2022 - 31May2023** |

PCR; Polymerase Chain Reaction, RAD; Rapid Antigen Detection

**Supplementary table 4. Sources for determining the denominator size for the incidence calculation**

| **Site** | **3301** | **3302** | **3401** | **3402** | **3901** | **3902** | **4401** | **4402** | **4901** | **4902** |
| --- | --- | --- | --- | --- | --- | --- | --- | --- | --- | --- |
| **Source** | Insee | Insee | Madrid Health Department | Instituto Galego de Estatística | ISTAT (National Institute of Statistics) | ISTAT.It | Office for National Statistics | Office for National Statistics, Population Estimates Dataset | Federal Statistical Office of Germany/Bavaria | Statistisches Amt für Hamburg und Schleswig-Holstein |
| **Source reference** | https://www.insee.fr | https://www.insee.fr | Provided directly by the Madrid Health Department | <http://www.ige.eu/igebdt/selector.jsp?COD=5310&paxina=001&c=0201001002> | [https://demo.istat.it](https://demo.istat.it/) | https://www.istat.it | https://www.ons.gov.uk | https://www.ons.gov.uk | https://[www.statistikdaten.bayern.de/genesis/online#astructure)](http://www.statistikdaten.bayern.de/genesis/online#astructure)) | https://www.statistik-nord.de |
| **Market share adjustment** | No | No | No | No | No | Yes | Yes | Yes | Yes | No |
| **Market share information source** |  |  |  |  |  | Istat- Italian National statistical institut | NHS England   - Integrated Care Board - London - ICBs and NHS trusts | NHS England  For all NHS trusts listed for London (https://www.england.nhs.uk)  Websites of other hospitals to verify the postcode and ability to admit acute paediatric infectious cases | Annual Hospital Reports from the University Hospital Würzburg and Missioklinik (Klinikum Würzburg Mitte GmbH) |  |

**Supplementary Figure 1. Monthly distribution of RSV hospitalizations by country and study hospital.**


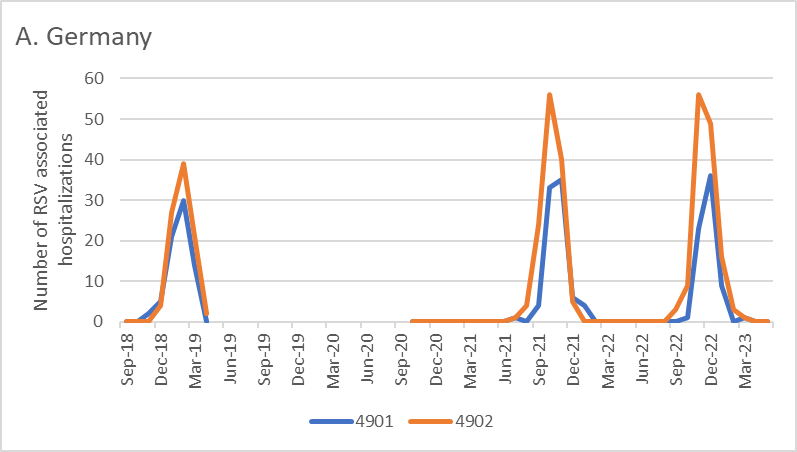


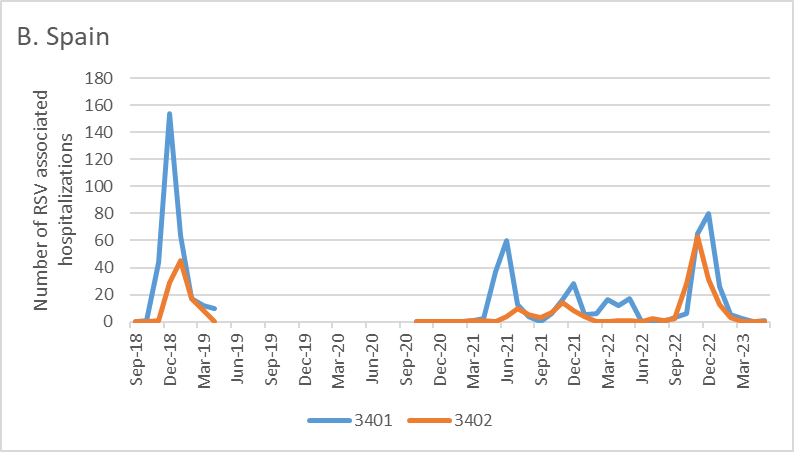


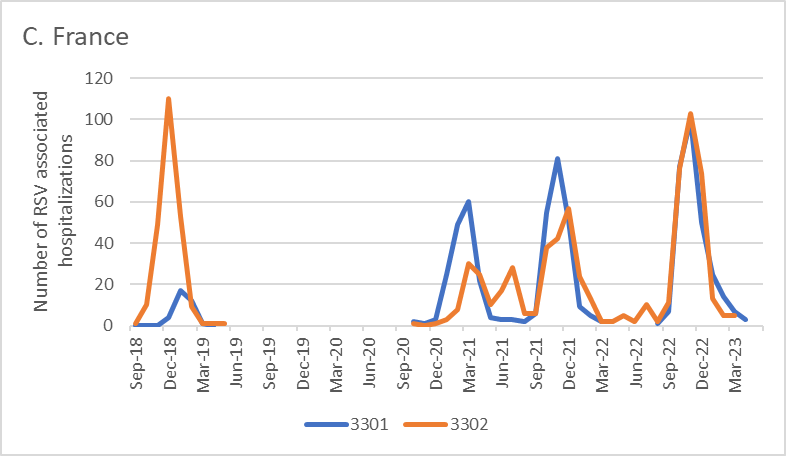


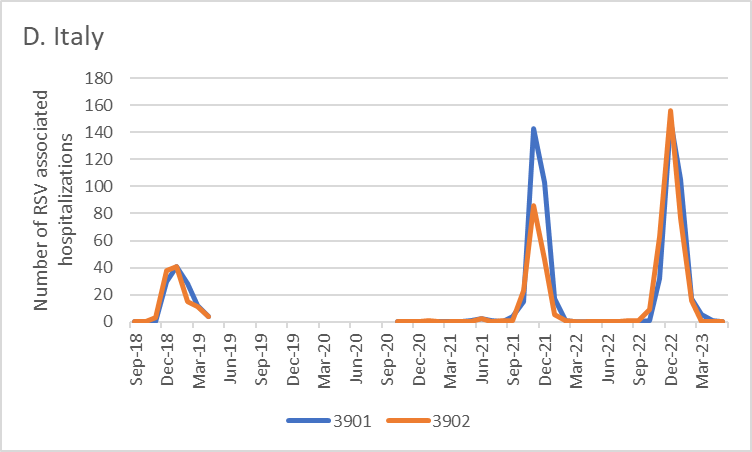


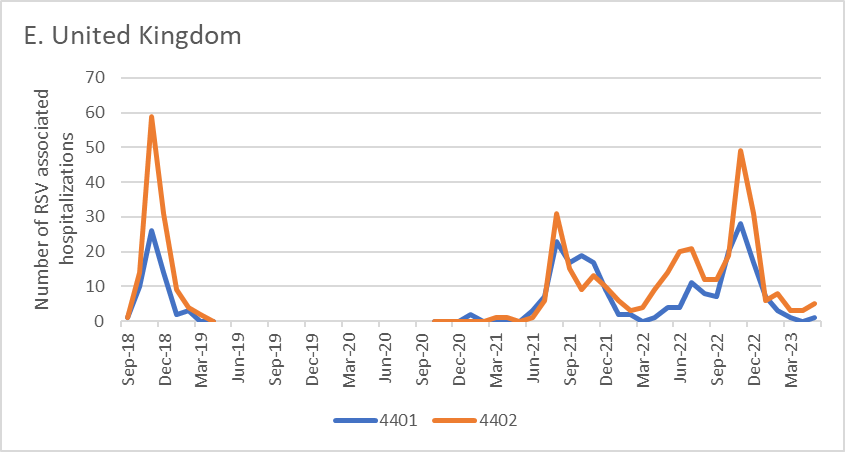

Supplement: MOESM1 [file 431_2025_6218_MOESM1_ESM.docx]
